# Supplementary material for: Cs3CuAs4Q8 (Q = S, Se): unique two-dimensional layered inorganic thioarsenates with the lowest Cu-to-As ratio and remarkable photocurrent responses
Source: Royal Society of Chemistry journal article supplement (doi:10.1039/d1dt03801j), 2021-12-07
Supplement: d1dt03801j1.pdf [file d1dt03801j1.pdf]

*Electronic Supplementary Information (ESI)*

---

**Cs<sub>3</sub>CuAs<sub>4</sub>Q<sub>8</sub> (Q = S, Se): unique two-dimensional layered inorganic thioarsenates with the lowest Cu-to-As ratio and remarkable photocurrent responses**

Chang Liu,<sup>a</sup> He-Di Yang,<sup>b,c</sup> Pei-Pei Hou,<sup>d</sup> Yu Xiao,<sup>d</sup> Yi Liu<sup>\*,d</sup> and Hua Lin,<sup>\*,b,e</sup>

<sup>a</sup>*School of Materials Science and Engineering, Shaanxi University of Science and Technology, Xi'an 710021, China*

<sup>b</sup>*State Key Laboratory of Structural Chemistry, Fujian Institute of Research on the Structure of Matter, Chinese Academy of Sciences, Fuzhou 350002, China*

<sup>c</sup>*College of Chemistry, Fuzhou University, Fujian 350002, China*

<sup>d</sup>*Institute for Composites Science Innovation (InCSI), School of Materials Science and Engineering, Zhejiang University, Hangzhou 310027, China*

<sup>e</sup>*Fujian Science & Technology Innovation Laboratory for Optoelectronic Information of China, Fuzhou 350108, China*

\*E-mail: liuyimse@zju.edu.cn and linhua@fjirsm.ac.cn.

**Electronic Supplementary Information Index**

**Figures and Tables**

**Figure S1.** SEM image and energy-dispersive X-ray spectroscopy analysis of (a) Cs<sub>3</sub>CuAs<sub>4</sub>S<sub>8</sub> and (b) Cs<sub>3</sub>CuAs<sub>4</sub>Se<sub>8</sub>.

**Figure S2.** The experimental and simulated powder XRD of (a) Cs<sub>3</sub>CuAs<sub>4</sub>S<sub>8</sub> and (b) Cs<sub>3</sub>CuAs<sub>4</sub>Se<sub>8</sub>.

**Figure S3.** 3D structure of VCu<sub>13</sub>As<sub>3</sub>S<sub>16</sub> along the *c* direction.

**Figure S4.** 3D structure of KCu<sub>4</sub>AsS<sub>4</sub> along the *b* direction.

**Figure S5.** 3D structure of RbCu<sub>4</sub>AsS<sub>4</sub> along the *b* direction.

**Figure S6.** (a) 2D layered structure of KCu<sub>2</sub>AsS<sub>3</sub> along the *a* direction. (b) [Cu<sub>2</sub>AsS<sub>3</sub>]<sup>-</sup> layer in the structure.

**Figure S7.** (a) 2D layered structure of RbCu<sub>2</sub>AsS<sub>3</sub> along the *b* direction. (b) [Cu<sub>2</sub>AsS<sub>3</sub>]<sup>-</sup>

layer in the structure.

**Figure S8.** (a) 2D layered structure of  $\text{CsCu}_2\text{AsS}_3$  viewed from  $b$  direction. (b)  $[\text{Cu}_2\text{AsS}_3]^-$  layer along the  $ab$  plane.

**Figure S9.** 3D structure of  $\text{Hg}_3\text{Cu}_6\text{As}_4\text{S}_{12}$  along the  $c$  direction.

**Figure S10.** 3D structure of  $\text{PbCuAsS}_3$  along the  $c$  direction.

**Figure S11.** 3D structure of  $\text{PtCuAsS}_3$  along the  $a$  direction.

**Figure S12.** (a) 2D layered structure of  $\text{Rb}_8\text{Cu}_6\text{As}_8\text{S}_{19}$  along the  $b$  direction. (b)  $[\text{Cu}_6\text{As}_8\text{S}_{19}]^{8-}$  layer in the  $ab$  plane.

**Table S1.** Selected bond lengths ( $\text{\AA}$ ) for  $\text{Cs}_3\text{CuAs}_4\text{Q}_8$  ( $\text{Q} = \text{S}, \text{Se}$ ).

**Table S2.** Selected Bond Angles (deg) for  $\text{Cs}_3\text{CuAs}_4\text{Q}_8$  ( $\text{Q} = \text{S}, \text{Se}$ ).

**Table S3.** Structural features of selected quaternary  $\text{X/Cu/As/Q}$  ( $\text{X} =$  inorganic cations;  $\text{Q} =$  chalcogen) system.

#### **4. References**

Figures and Tables

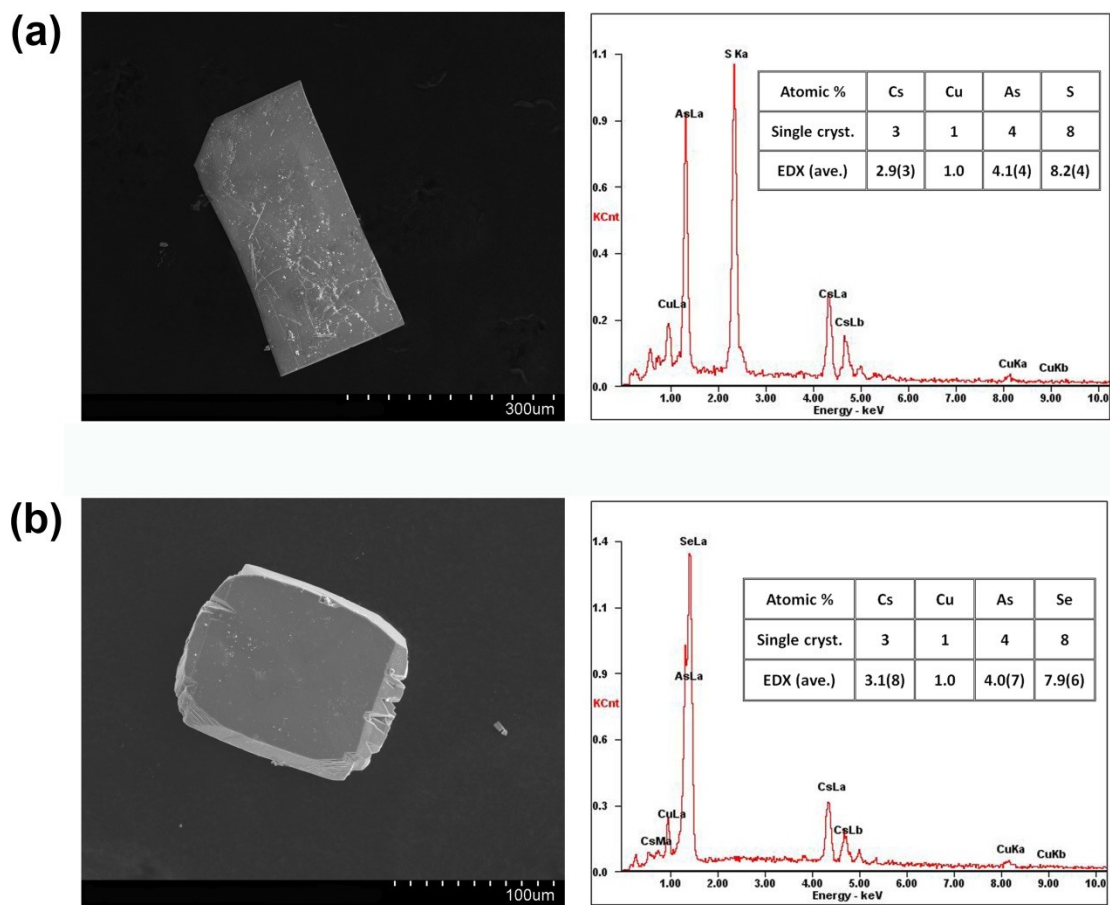

**Figure S1.** SEM image and energy-dispersive X-ray spectroscopy analysis of (a)  $\text{Cs}_3\text{CuAs}_4\text{S}_8$  and (b)  $\text{Cs}_3\text{CuAs}_4\text{Se}_8$ .

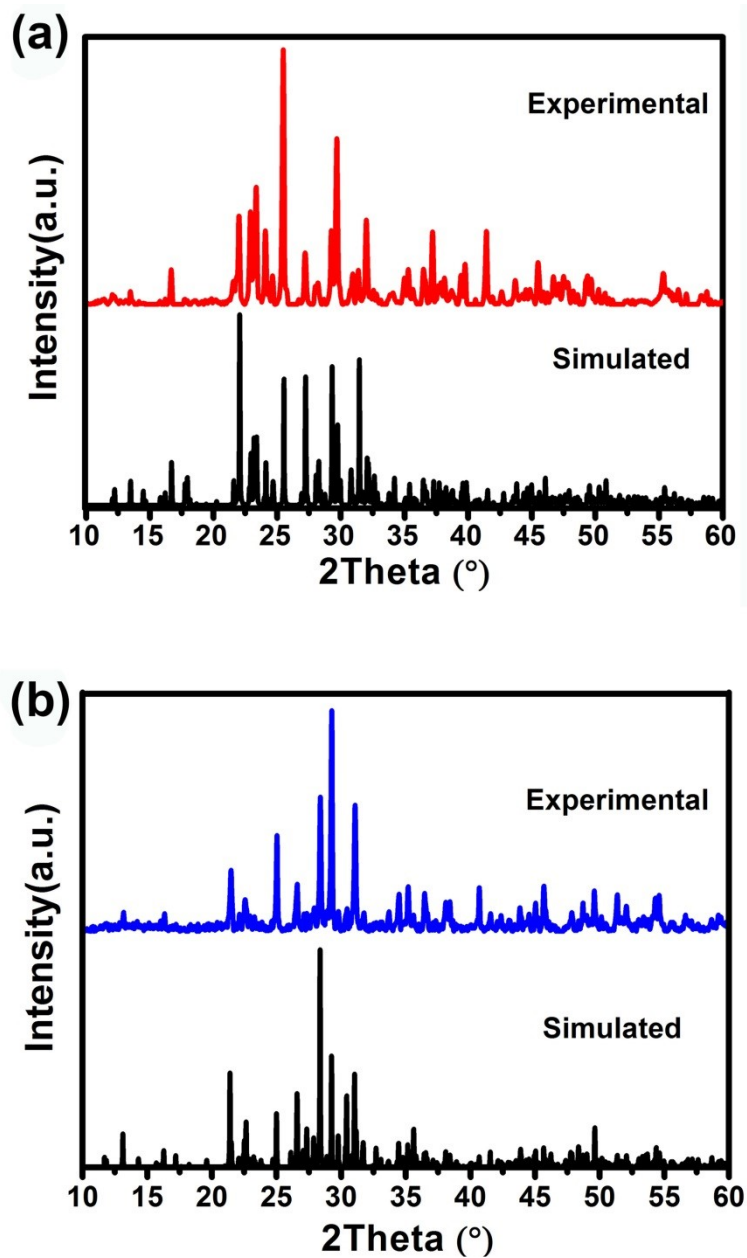

**Figure S2.** The experimental and simulated powder XRD of of (a)  $\text{Cs}_3\text{CuAs}_4\text{S}_8$  and (b)  $\text{Cs}_3\text{CuAs}_4\text{Se}_8$ .

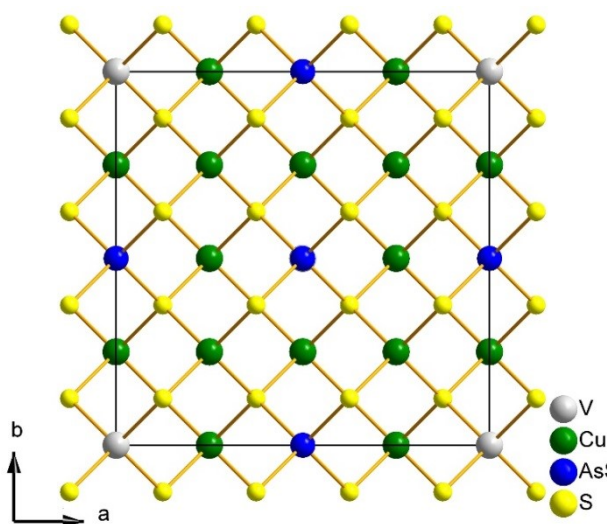

Figure S3. 3D structure of  $\text{VCu}_{13}\text{As}_3\text{S}_{16}$  along the  $c$  direction.

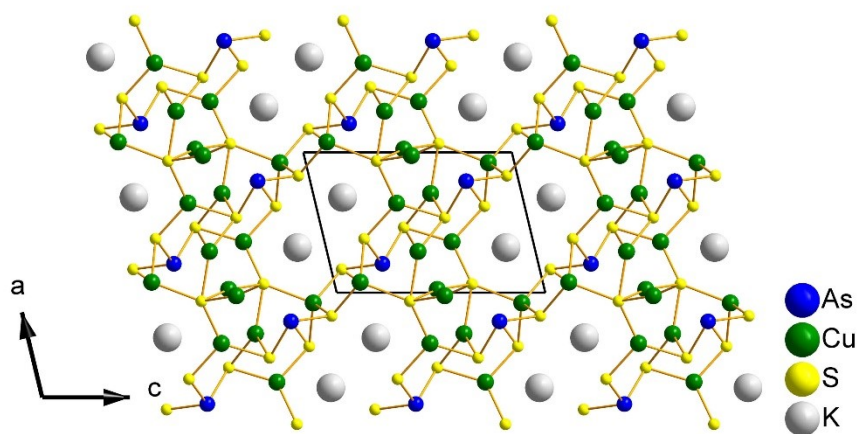

Figure S4. 3D structure of  $\text{KCu}_4\text{AsS}_4$  along the  $b$  direction.

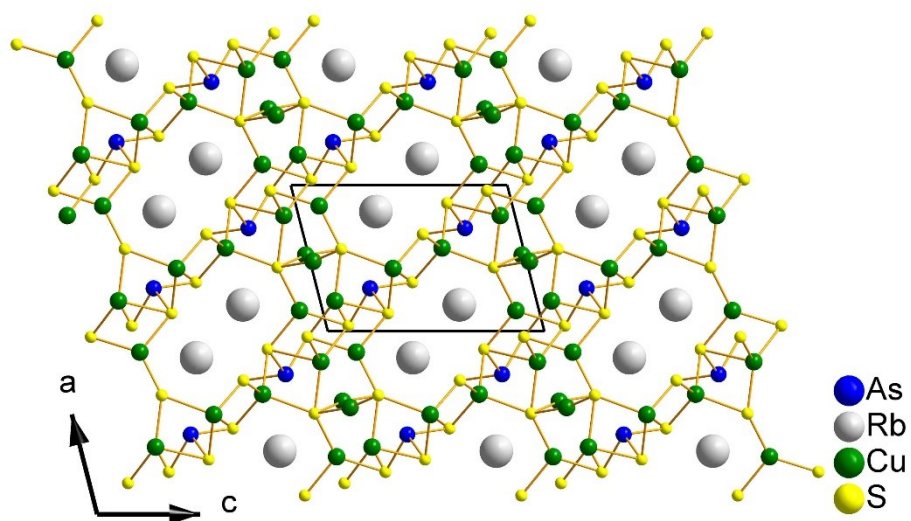

Figure S5. 3D structure of  $\text{RbCu}_4\text{AsS}_4$  along the  $b$  direction.

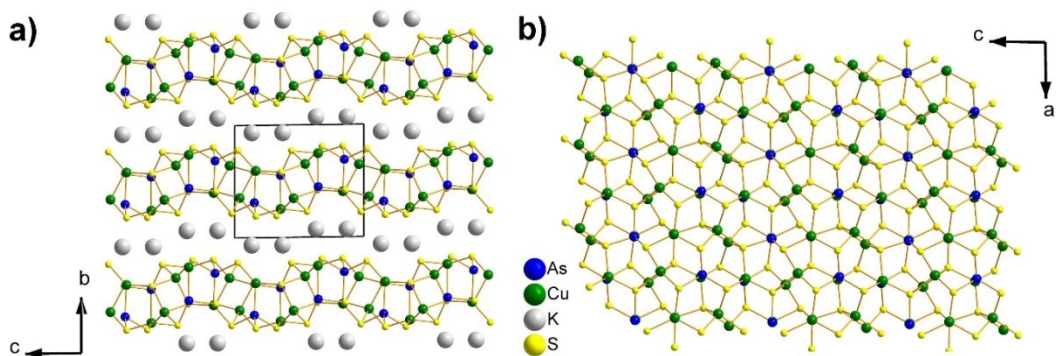

**Figure S6.** (a) 2D layered structure of  $\text{KCu}_2\text{AsS}_3$  along the  $a$  direction. (b)  $[\text{Cu}_2\text{AsS}_3]^-$  layer in the structure.

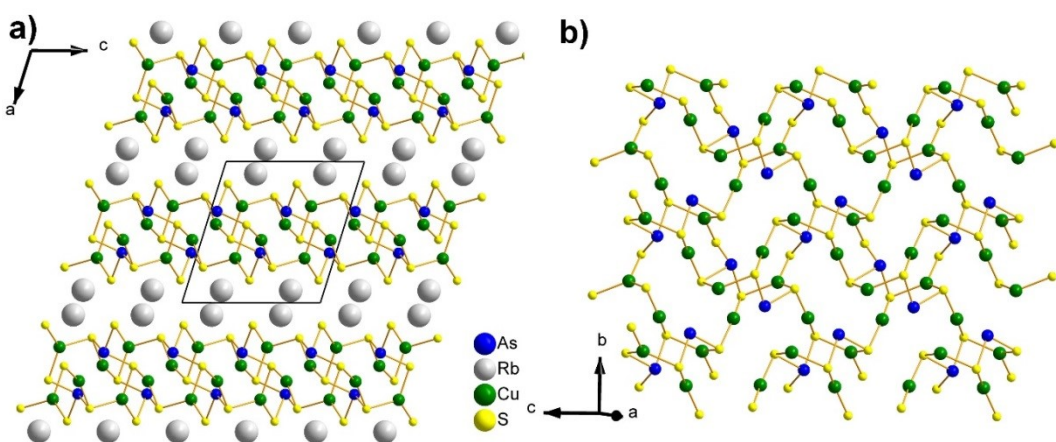

**Figure S7.** (a) 2D layered structure of  $\text{RbCu}_2\text{AsS}_3$  along the  $b$  direction. (b)  $[\text{Cu}_2\text{AsS}_3]^-$  layer in the structure.

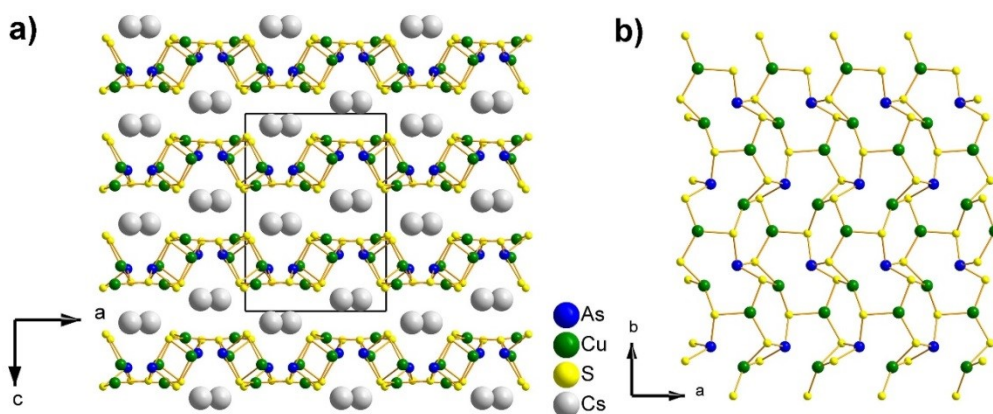

**Figure S8.** (a) 2D layered structure of  $\text{CsCu}_2\text{AsS}_3$  viewed from  $b$  direction. (b)  $[\text{Cu}_2\text{AsS}_3]^-$  layer along the  $ab$  plane.

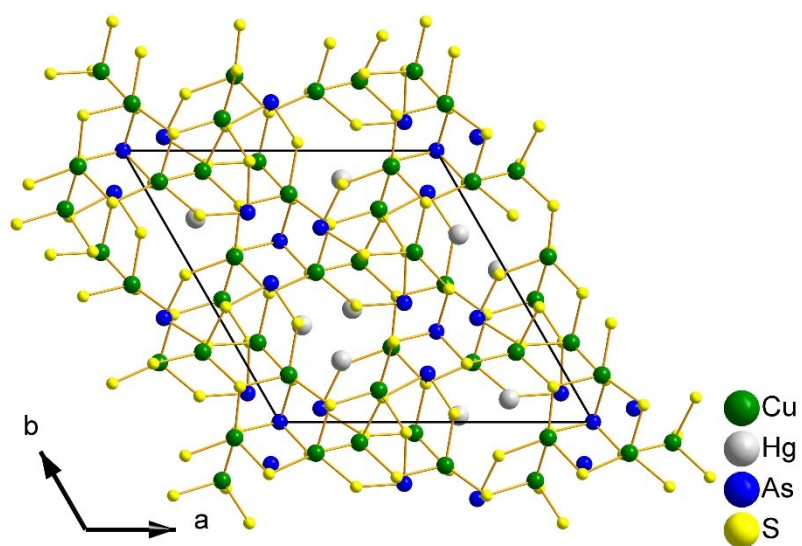

Figure S9. 3D structure of  $\text{Hg}_3\text{Cu}_6\text{As}_4\text{S}_{12}$  along the  $c$  direction.

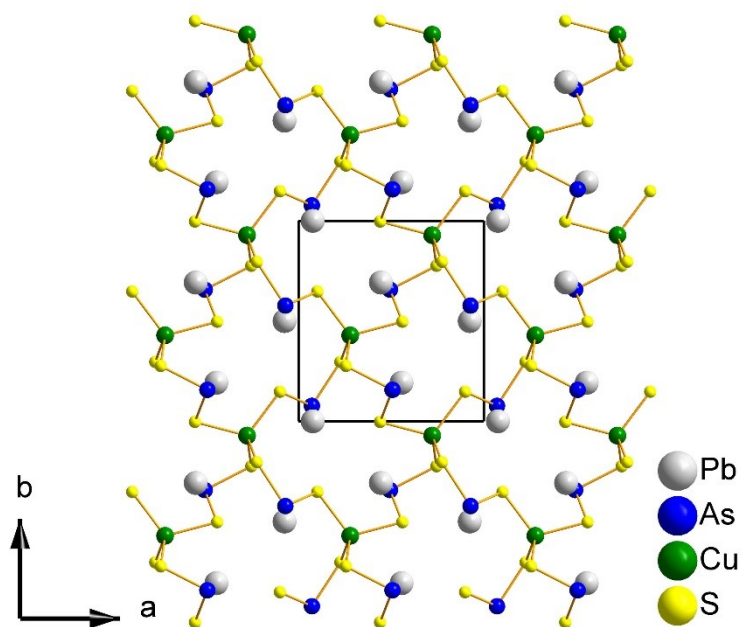

Figure S10. 3D structure of  $\text{PbCuAsS}_3$  along the  $c$  direction.

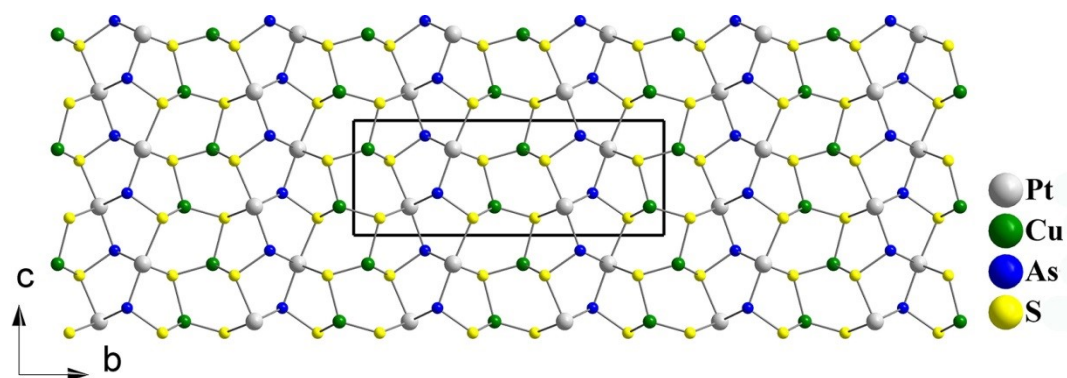

Figure S11. 3D structure of PtCuAsS<sub>3</sub> along the *a* direction.

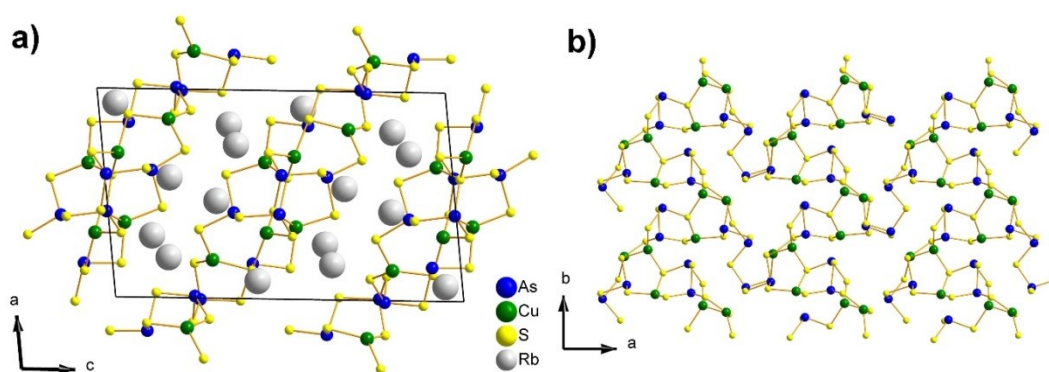

Figure S12. (a) 2D layered structure of Rb<sub>8</sub>Cu<sub>6</sub>As<sub>8</sub>S<sub>19</sub> along the *b* direction. (b)

[Cu<sub>6</sub>As<sub>8</sub>S<sub>19</sub>]<sup>8-</sup> layer in the *ab* plane.



## *Electronic Supplementary Information (ESI)*

**Table S1.** Selected bond lengths (Å) for Cs<sub>3</sub>CuAs<sub>4</sub>Q<sub>8</sub> (Q = S, Se).

| Cs <sub>3</sub> CuAs <sub>4</sub> S <sub>8</sub> |            | Cs <sub>3</sub> CuAs <sub>4</sub> Se <sub>8</sub> |            |
|--------------------------------------------------|------------|---------------------------------------------------|------------|
| Cu(1)-As(4)                                      | 2.6628(18) | Cu(1)-As(4)                                       | 2.615(2)   |
| Cu(1)-S(4)                                       | 2.328(3)   | Cu(1)-Se(4)                                       | 2.4414(15) |
| Cu(1)-S(5)                                       | 2.288(3)   | Cu(1)-Se(5)                                       | 2.3908(16) |
| Cu(1)-S(8)                                       | 2.298(3)   | Cu(1)-Se(8)                                       | 2.4136(14) |
| As(1)-S(2)                                       | 2.154(3)   | As(1)-Se(2)                                       | 2.3039(15) |
| As(1)-S(3)                                       | 2.311(3)   | As(1)-Se(3)                                       | 2.434(2)   |
| As(1)-S(7)                                       | 2.313(3)   | As(1)-Se(7)                                       | 2.4487(15) |
| As(2)-S(3)                                       | 2.252(3)   | As(2)-Se(3)                                       | 2.3861(14) |
| As(2)-S(4)                                       | 2.189(3)   | As(2)-Se(4)                                       | 2.3394(18) |
| As(2)-S(6)                                       | 2.289(3)   | As(2)-Se(6)                                       | 2.4215(13) |
| As(3)-S(1)                                       | 2.299(3)   | As(3)-Se(1)                                       | 2.4273(18) |
| As(3)-S(7)                                       | 2.264(3)   | As(3)-Se(7)                                       | 2.4110(13) |
| As(3)-S(8)                                       | 2.201(3)   | As(3)-Se(8)                                       | 2.3537(13) |
| As(4)-S(1)                                       | 2.280(3)   | As(4)-Se(1)                                       | 2.4148(13) |
| As(4)-S(5)                                       | 2.179(3)   | As(4)-Se(5)                                       | 2.3322(14) |
| As(4)-S(6)                                       | 2.318(3)   | As(4)-Se(6)                                       | 2.4454(15) |
| Cs(1)-S(2)                                       | 3.513(3)   | Cs(1)-Se(2)                                       | 3.6485(13) |
| Cs(1)-S(5)                                       | 3.849(3)   | Cs(1)-Se(7)                                       | 4.3085(13) |
| Cs(1)-S(6)                                       | 3.924(3)   | Cs(1)-Se(6)                                       | 3.9442(18) |
| Cs(2)-S(1)                                       | 3.688(3)   | Cs(2)-Se(1)                                       | 3.7381(16) |
| Cs(2)-S(1)                                       | 3.690(3)   | Cs(2)-Se(1)                                       | 3.7595(15) |
| Cs(2)-S(1)                                       | 4.079(3)   | Cs(2)-Se(1)                                       | 4.326(2)   |
| Cs(2)-S(2)                                       | 3.504(3)   | Cs(2)-Se(2)                                       | 3.606(2)   |
| Cs(2)-S(2)                                       | 3.880(3)   | Cs(2)-Se(2)                                       | 3.9250(15) |
| Cs(2)-S(5)                                       | 4.159(3)   | Cs(2)-Se(5)                                       | 4.328(2)   |

*Electronic Supplementary Information (ESI)*

---

|            |          |             |            |
|------------|----------|-------------|------------|
| Cs(2)-S(6) | 3.636(3) | Cs(2)-Se(6) | 3.7384(12) |
| Cs(2)-S(7) | 3.711(3) | Cs(2)-Se(7) | 3.9400(14) |
| Cs(2)-S(7) | 3.896(3) | Cs(2)-Se(7) | 3.935(2)   |
| Cs(2)-S(8) | 3.617(3) | Cs(2)-Se(8) | 3.6504(18) |
| Cs(3)-S(2) | 3.477(4) | Cs(3)-Se(2) | 3.6005(19) |
| Cs(3)-S(3) | 4.075(3) | Cs(3)-Se(3) | 3.7215(12) |
| Cs(3)-S(3) | 3.631(3) | Cs(3)-Se(3) | 4.1309(15) |
| Cs(3)-S(4) | 3.885(3) | Cs(3)-Se(4) | 3.7162(13) |
| Cs(3)-S(4) | 3.537(3) | Cs(3)-Se(4) | 3.9687(16) |
| Cs(3)-S(8) | 3.547(3) | Cs(3)-Se(8) | 3.5847(12) |
| Cs(3)-S(8) | 3.506(2) | Cs(3)-Se(8) | 3.6184(19) |
| Cs(3)-S(7) | 4.148(3) | Cs(3)-Se(7) | 4.341(2)   |
| Cs(4)-S(4) | 3.527(3) | Cs(4)-Se(4) | 3.6124(11) |
| Cs(4)-S(5) | 3.524(3) | Cs(4)-Se(5) | 3.6488(13) |
| Cs(4)-S(6) | 3.583(3) | Cs(4)-Se(6) | 3.6866(17) |
| Cs(4)-S(8) | 3.688(3) | Cs(4)-Se(8) | 3.8163(11) |

---

**Electronic Supplementary Information (ESI)**

---

**Table S2.** Selected Bond Angles (deg) for Cs<sub>3</sub>CuAs<sub>4</sub>Q<sub>8</sub> (Q = S, Se).

| Cs <sub>3</sub> CuAs <sub>4</sub> S <sub>8</sub> |            | Cs <sub>3</sub> CuAs <sub>4</sub> Se <sub>8</sub> |           |
|--------------------------------------------------|------------|---------------------------------------------------|-----------|
| S(1)-As(4)-S(6)                                  | 93.11(11)  | Se(1)-As(4)-Se(6)                                 | 93.01(5)  |
| S(2)-As(1)-S(3)                                  | 99.16(12)  | Se(2)-As(1)-Se(3)                                 | 98.73(6)  |
| S(2)-As(1)-S(7)                                  | 102.99(11) | Se(2)-As(1)-Se(7)                                 | 103.37(5) |
| S(3)-As(1)-S(7)                                  | 98.92(12)  | Se(3)-As(1)-Se(7)                                 | 98.80(6)  |
| S(3)-As(2)-S(6)                                  | 98.27(11)  | Se(3)-As(2)-Se(6)                                 | 97.46(5)  |
| S(4)-As(2)-S(3)                                  | 100.14(11) | Se(4)-As(2)-Se(3)                                 | 99.45(5)  |
| S(4)-As(2)-S(6)                                  | 106.14(11) | Se(4)-As(2)-Se(6)                                 | 107.82(6) |
| S(5)-As(4)-S(1)                                  | 104.32(11) | Se(5)-As(4)-Se(1)                                 | 103.78(5) |
| S(5)-As(4)-S(6)                                  | 102.93(10) | Se(5)-As(4)-Se(6)                                 | 102.46(6) |
| S(7)-As(3)-S(1)                                  | 96.36(11)  | Se(7)-As(3)-Se(1)                                 | 96.31(6)  |
| S(8)-As(3)-S(1)                                  | 101.75(10) | Se(8)-As(3)-Se(1)                                 | 101.29(5) |
| S(8)-As(3)-S(7)                                  | 100.64(11) | Se(8)-As(3)-Se(7)                                 | 101.24(5) |
| S(1)-As(4)-Cu(1)                                 | 100.25(8)  | Se(1)-As(4)-Cu(1)                                 | 100.97(5) |
| S(5)-As(4)-Cu(1)                                 | 124.94(9)  | Se(5)-As(4)-Cu(1)                                 | 125.30(5) |
| S(6)-As(4)-Cu(1)                                 | 124.12(9)  | Se(6)-As(4)-Cu(1)                                 | 124.07(6) |
| S(5)-Cu(1)-S(4)                                  | 115.04(11) | Se(5)-Cu(1)-Se(4)                                 | 116.95(6) |
| S(5)-Cu(1)-S(8)                                  | 121.42(11) | Se(5)-Cu(1)-Se(8)                                 | 116.81(6) |
| S(8)-Cu(1)-S(4)                                  | 115.36(11) | Se(8)-Cu(1)-Se(4)                                 | 115.45(5) |
| S(4)-Cu(1)-As(4)                                 | 89.66(9)   | Se(4)-Cu(1)-As(4)                                 | 88.69(6)  |
| S(5)-Cu(1)-As(4)                                 | 119.66(8)  | Se(5)-Cu(1)-As(4)                                 | 122.28(6) |
| S(8)-Cu(1)-As(4)                                 | 88.31(9)   | Se(8)-Cu(1)-As(4)                                 | 91.15(6)  |

***Electronic Supplementary Information (ESI)***

---

**Table S3.** Structural features of selected quaternary X/Cu/As/Q (X = inorganic cations; Q = chalcogen) system.

| Compounds                                                       | Cu/As ratio | Crystal system    | Space group                     | Structural dimension | Ref.             |
|-----------------------------------------------------------------|-------------|-------------------|---------------------------------|----------------------|------------------|
| VCu <sub>13</sub> As <sub>3</sub> S <sub>16</sub>               | 4.33        | Cubic             | $P\bar{4}3n$                    | 3D                   | 1                |
| KCu <sub>4</sub> AsS <sub>4</sub>                               | 4.0         | Monoclinic        | $P2_1$                          | 3D                   | 2                |
| RbCu <sub>4</sub> AsS <sub>4</sub>                              | 4.0         | Monoclinic        | $P2_1$                          | 3D                   | 2                |
| KCu <sub>2</sub> AsS <sub>3</sub>                               | 2.0         | Triclinic         | $P\bar{1}$                      | 2D                   | 2                |
| RbCu <sub>2</sub> AsS <sub>3</sub>                              | 2.0         | Monoclinic        | $P2_1/c$                        | 2D                   | 2                |
| CsCu <sub>2</sub> AsS <sub>3</sub>                              | 2.0         | Orthorhombic      | $Pbca$                          | 2D                   | 3                |
| Hg <sub>3</sub> Cu <sub>6</sub> As <sub>4</sub> S <sub>12</sub> | 1.5         | Trigonal          | $R\bar{3}$                      | 3D                   | 4                |
| PbCuAsS <sub>3</sub>                                            | 1.0         | Orthorhombic      | $Pmn2_1$                        | 3D                   | 5                |
| PtCuAsS <sub>3</sub>                                            | 1.0         | Monoclinic        | $Cc$                            | 3D                   | 6                |
| Rb <sub>8</sub> Cu <sub>6</sub> As <sub>8</sub> S <sub>19</sub> | 0.75        | Monoclinic        | $P2_1$                          | 2D                   | 7                |
| <b>Cs<sub>3</sub>CuAs<sub>4</sub>S<sub>8</sub></b>              | <b>0.25</b> | <b>Monoclinic</b> | <b><math>P2_1/c</math> (14)</b> | <b>2D</b>            | <b>This work</b> |
| <b>Cs<sub>3</sub>CuAs<sub>4</sub>Se<sub>8</sub></b>             | <b>0.25</b> | <b>Monoclinic</b> | <b><math>P2_1/c</math> (14)</b> | <b>2D</b>            | <b>This work</b> |

#### 4. References

- (1) O. Paolo, M. Stefano, D. Giuseppe and V. Giovanna, *Can. Mineral.*, 1981, **19**, 423–427.
- (2) H. G. Yao, M. Ji, S. H. Ji and Y. L. An, *J. Solid State Chem.*, 2013, **198**, 289–294.
- (3) H. G. Yao, C. F. Tang, Y. L. An, Z. J. Ou, G. H. Wu, P. Lan and Y. L. Zheng, *J. Solid State Chem.*, 2017, **246**, 87–91.
- (4) J. E. Jerome, P. T. Wood, W. T. Pennington and J. W. Kolis, *Inorg. Chem.*, 1994, **33**, 1733–1734.
- (5) V. I. Vasil'ev, N. V. Pervukhina, S. V. Borisov, S. A. Magarill, D. Y. Naumov and N. V. Kurat'eva, *Zapiski Vses. Miner. Obshch.*, 2009, **138**, 75–82.
- (6) K. S. Ding, C. H. He and Q. T. Zheng, *Kexue Tongbao (Foreign Language Edition)*, 1982, **27**, 62–66.
- (7) Y. Takeuchi and N. Haga, *Z. Krist. Cryst. Mater.*, 1969, **130**, 254–260.
